# Supplementary material
Source: MDPI journal article supplement (https://www.mdpi.com/1424-2818/14/8/660)
Supplement: s1 [file s1]

# Diversity and Functional Relevance of Canopy Arthropods in Central Europe

Andreas Floren <sup>1,2,\*</sup>, Karl Eduard Linsenmair <sup>2</sup> and Tobias Müller <sup>1</sup>

<sup>1</sup> Department of Bioinformatics, Biocenter, University of Würzburg, Am Hubland, D-97074 Würzburg, Germany; tobias.mueller@uni-wuerzburg.de

<sup>2</sup> Department of Animal Ecology and Tropical Biology, Biocenter, University of Würzburg, Hans Martin-Weg 5, D-97074 Würzburg, Germany; ke\_lins@biozentrum.uni-wuerzburg.de

\* Correspondence: floren@biozentrum.uni-wuerzburg.de

Table S1. Distribution of the 1,152 foggings carried out in different sites in Central Europe with forest type specific information. Research was carried out from 1995 to 2020; unmanaged forests, com=commercial forest, prim=primary forest).

| Country  | Area            | Year                               | Foggings | Altitude | Forest type                                                    | Literature                                                    |
|----------|-----------------|------------------------------------|----------|----------|----------------------------------------------------------------|---------------------------------------------------------------|
| Germany  | Steigerwald     | 1995, 1996, 2004-2007<br>2011-2013 | 131      | 350      | Light oak forest, formerly uses as coppice with standard (com) |                                                               |
| Germany  | Münnerstadt     | 1997, 1998                         | 41       | 330      | Light oak forest, formerly uses as coppice with standard (com) |                                                               |
| Germany  | Hainich         | 1997, 2008, 2011                   | 90       | 400      | Randomly chosen forest sites (com, unmanaged)                  | Fischer et al. 2010                                           |
| Germany  | Leipzig         | 2003, 2006, 2008                   | 81       | 160      | Mixed floodplain forest (com, unmanaged)                       | Unterseher et al. 2007                                        |
| Germany  | Alb             | 2007, 2008, 2012                   | 125      | 800      | Randomly chosen forest sites (com, unmanaged)                  | Fischer et al. 2010                                           |
| Germany  | Chorin          | 2010                               | 143      | 80       | Randomly chosen forest sites (com, unmanaged)                  | Fischer et al. 2010                                           |
| Germany  | Elb-Auen Dessau | 2016, 2017, 2020                   | 182      | 75       | Mixed hardwood floodplain forest                               |                                                               |
| Germany  | Schwebheim      | 2007                               | 18       | 210      | Pure birch stand on moorland meadow (unmanaged)                |                                                               |
| Germany  | Spessart        | 2004                               | 1        | 580      | Old oak forest (unmanaged)                                     |                                                               |
| Romania  | Semenic         | 1999                               | 13       | 1000     | Natural beech forest (prim)                                    |                                                               |
| Slovenia | Kocevje         | 1999                               | 19       | 850      | Dinaric silver fir-european beech forest (prim)                | Boncina, A. 1999                                              |
| Poland   | Bialowieca      | 2001-2004                          | 249      | 160      | Mixed forest, prim (oak-hombeam-linden), unmanaged             | Falinski, J.B. 1986<br>Jedrzejewska B., Jedrzejewski, W. 1998 |
| Poland   | Borezka         | 2003                               | 11       | 200      | Mixed forest (oak-hombeam-linden), unmanaged                   |                                                               |
| Poland   | Kampinoski      | 2003                               | 15       | 80       | Oak-pine Mixed forest (prim, unmanaged)                        |                                                               |
| Poland   | Komanza         | 2003                               | 7        | 480      | Mixed beech forest (com)                                       |                                                               |
| Poland   | Nurzec          | 2003                               | 8        | 160      | Oak forest (com)                                               |                                                               |
| Belarus  | Asinniki        | 2004                               | 9        | 160      | Oak forest (com)                                               |                                                               |
| Belarus  | Svislac         | 2004                               | 16       | 140      | Riverine Mixed forest (com)                                    |                                                               |

Table S2. Number of arthropods per taxon sorted by individual numbers. The total number of trees fogged was 1,152. Because of their high local abundance and ecological impact aphids and ants are shown separately. Thysanoptera, Acarina, and Collembola were not included due to large differences in numbers between sampled trees.

| Taxa           | Counts         | Percent    |
|----------------|----------------|------------|
| Diptera        | 586037         | 18.05      |
| Homoptera      | 499463         | 15.38      |
| Aphidae        | 251623         | 7.75       |
| Coleoptera     | 358202         | 11.03      |
| Heteroptera    | 354998         | 10.93      |
| Psocoptera     | 347474         | 10.70      |
| Hymenoptera    | 296325         | 9.13       |
| Formicidae     | 140455         | 4.33       |
| Lepidoptera    | 184379         | 5.68       |
| Araneae        | 96517          | 2.97       |
| Opiliones      | 7479           | 0.23       |
| Plecoptera     | 85426          | 2.63       |
| Neuroptera     | 15906          | 0.49       |
| Blattodea      | 7005           | 0.22       |
| Orthoptera     | 6136           | 0.19       |
| Mecoptera      | 2627           | 0.08       |
| Trichoptera    | 1930           | 0.06       |
| Raphidioptera  | 1246           | 0.04       |
| Dermaptera     | 829            | 0.03       |
| Isopoda        | 606            | 0.02       |
| Diplopoda      | 468            | 0.01       |
| Chilopoda      | 451            | 0.01       |
| Ephemeroptera  | 424            | 0.01       |
| Molluska       | 256            | 0.01       |
| Pseudoscorpion | 87             | 0.00       |
| Archaeognatha  | 77             | 0.00       |
| Megaloptera    | 43             | 0.00       |
| Odonata        | 39             | 0.00       |
| Annelida       | 11             | 0.00       |
| <b>Total</b>   | <b>3246519</b> | <b>100</b> |

Table S3. Assignment of arthropods to feeding guilds as they were collected by fogging in June. Only few individuals of adult Lepidoptera were collected in June, which were not included in the analysis. Taxa were also assigned to one of three categories according to their abundance and constancy in the canopy: major = regularly frequent, minor = regularly rare, sporadic = sporadic occurrence.

| <b>Taxon</b>     | <b>Classification</b> | <b>Feeding guild</b>                 |
|------------------|-----------------------|--------------------------------------|
| Diptera          | major                 | phy, zoo, myc, xyl, sap, para        |
| Homoptera        | major                 | phy (sap-suckers)                    |
| Heteroptera      | major                 | zoo, phy.zoo, myc, phy (sap-suckers) |
| Coleoptera       | major                 | phy, zoo, xyl, myc, sap              |
| Psocoptera       | major                 | epiphyll grazer                      |
| Hymenoptera      | major                 | phy, para                            |
| Lepidoptera      | major                 | phy (chewers)                        |
| Araneae          | major                 | zoo                                  |
| Formicidae       | minor                 | zoo                                  |
| Aphidae          | minor                 | phy (sap-suckers)                    |
| Neuroptera       | minor                 | zoo                                  |
| Opiliones        | minor                 | zoo                                  |
| Blattodea        | minor                 | sap                                  |
| Orthoptera       | minor                 | phy (chewers)                        |
| Dermaptera       | minor                 | sap                                  |
| Plecoptera       | sporadic              | epiphyll grazer                      |
| Ephemeroptera    | sporadic              | non-feeding                          |
| Trichoptera      | sporadic              | non-feeding                          |
| Mecoptera        | sporadic              | zoo                                  |
| Raphidioptera    | sporadic              | zoo                                  |
| Megaloptera      | sporadic              | zoo                                  |
| Odonata          | sporadic              | zoo                                  |
| Isopoda          | sporadic              | sap                                  |
| Diplopoda        | sporadic              | sap                                  |
| Chilopoda        | sporadic              | zoo                                  |
| Pseudoscorpiones | sporadic              | zoo                                  |
| Archaeognatha    | sporadic              | sap                                  |
| Annelida         | sporadic              | sap                                  |
| Molluska         | sporadic              | sap                                  |

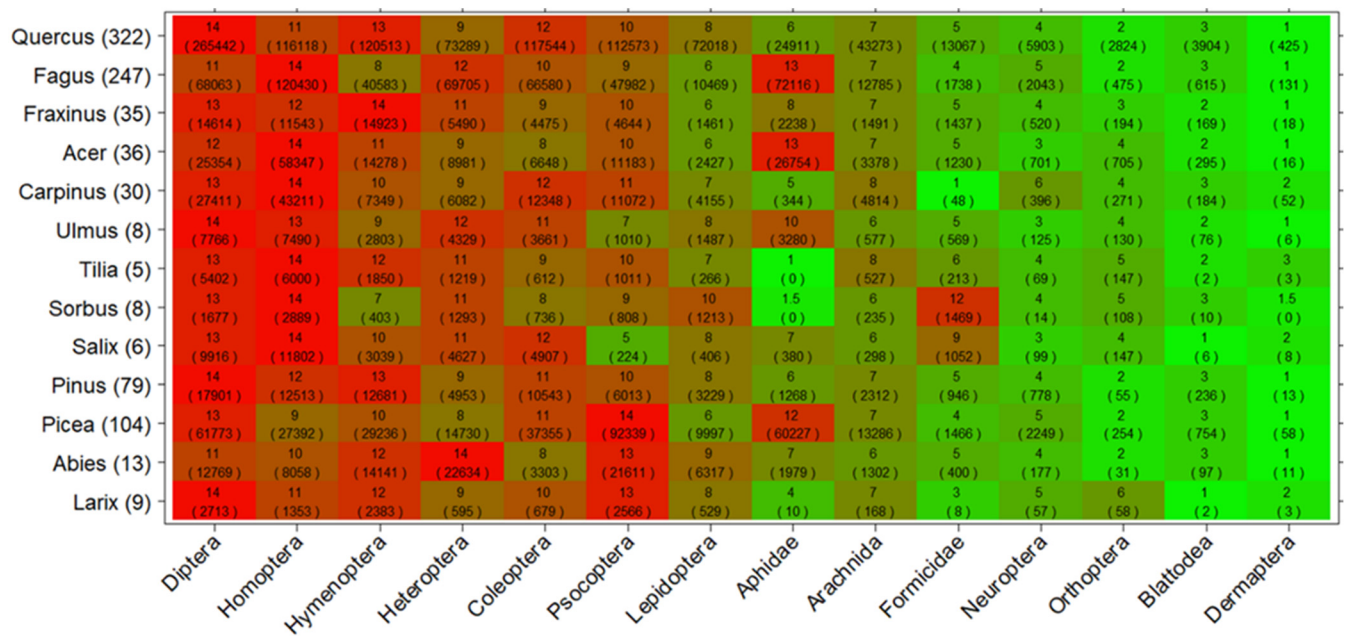

Figure S1. Ranked taxa abundance in the canopy communities of all fogged tree genera total number of individuals in brackets below taxon rank. The darker the shade of green, the higher the rank of the particular group; the highest values are shown in bright red. Tree genera on the y-axis number of foggings in brackets. Included are all tree genera fogged in more than five trees. Mass occurrence of individual taxa (see text) are excluded.

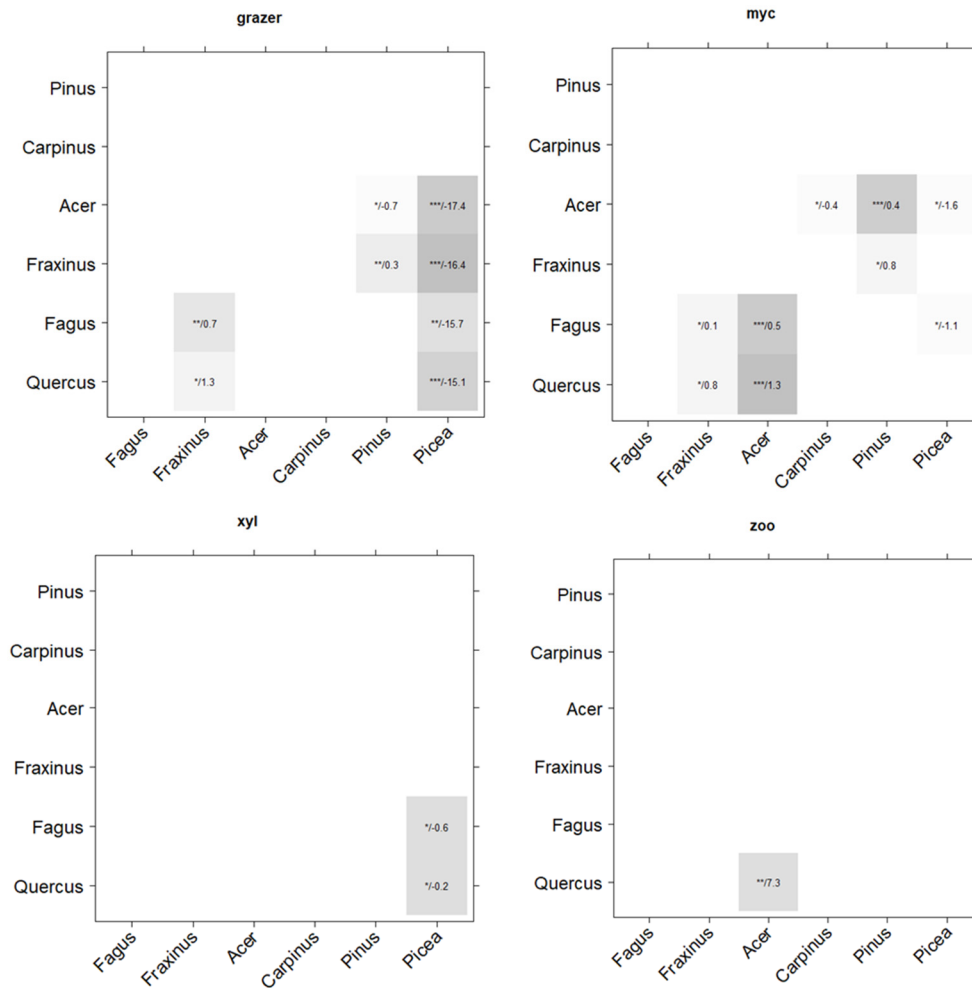

Figure S2. Pairwise Wilcoxon tests with Benjamini-Hochberg p-value adjustment of eight feeding guilds on all tree genera. Only tree genera with more than ten trees fogged are considered. Visualised are p-values; numbers are mean differences in percentages of specimens per tree and feeding guild percent individuals on y-axis minus percent individuals on x-axis. Non-significant comparisons not shown.

Table S4. Full model results of the regression models of guild composition between tree genera shown in MS.

| ALL Foggings |     |          |         |          |         |
|--------------|-----|----------|---------|----------|---------|
|              | Df  | SumOfSqs | R2      | F        | Pr..F.  |
| gattung      | 6   | 6.48089  | 0.20146 | 21.80808 | 0.00001 |
| area         | 11  | 6.7077   | 0.20851 | 12.31161 | 0.00001 |
| year         | 5   | 4.27481  | 0.13288 | 17.26159 | 0.00001 |
| prim.dist    | 1   | 0.13076  | 0.00406 | 2.64002  | 0.04127 |
| height       | 1   | 0.03485  | 0.00108 | 0.70366  | 0.56755 |
| leaf.cover   | 1   | 0.03291  | 0.00102 | 0.66451  | 0.59434 |
| altitude     | 1   | 0.04531  | 0.00141 | 0.91487  | 0.43176 |
| Residual     | 292 | 14.46268 | 0.44957 | NA       | NA      |
| Total        | 318 | 32.16991 | 1       | NA       | NA      |

  

| Deciduous trees |     |          |         |          |         |
|-----------------|-----|----------|---------|----------|---------|
|                 | Df  | SumOfSqs | R2      | F        | Pr..F.  |
| gattung         | 4   | 4.7756   | 0.18789 | 28.15782 | 0.00001 |
| area            | 10  | 5.72385  | 0.22519 | 13.49953 | 0.00001 |
| year            | 5   | 4.56828  | 0.17973 | 21.54834 | 0.00001 |
| prim.dist       | 1   | 0.32375  | 0.01274 | 7.63551  | 0.00012 |
| height          | 1   | 0.06567  | 0.00258 | 1.54889  | 0.18871 |
| leaf.cover      | 1   | 0.04317  | 0.0017  | 1.01808  | 0.37941 |
| altitude        | 1   | 0.08038  | 0.00316 | 1.89583  | 0.12158 |
| Residual        | 232 | 9.83688  | 0.38701 | NA       | NA      |
| Total           | 255 | 25.41758 | 1       | NA       | NA      |

  

| Coniferous trees |    |          |         |          |         |
|------------------|----|----------|---------|----------|---------|
|                  | Df | SumOfSqs | R2      | F        | Pr..F.  |
| gattung          | 1  | 0.97537  | 0.16196 | 17.73496 | 0.00001 |
| area             | 7  | 1.96693  | 0.3266  | 5.10918  | 0.00001 |
| year             | 2  | 0.18552  | 0.0308  | 1.6866   | 0.13537 |
| prim.dist        | 1  | 0.03589  | 0.00596 | 0.6525   | 0.583   |
| height           | 1  | 0.16038  | 0.02663 | 2.91623  | 0.03824 |
| leaf.cover       | 1  | 0.05045  | 0.00838 | 0.91738  | 0.42608 |
| altitude         | 1  | 0.00801  | 0.00133 | 0.14561  | 0.94885 |
| Residual         | 48 | 2.63986  | 0.43834 | NA       | NA      |
| Total            | 62 | 6.02242  | 1       | NA       | NA      |

  

| Poland, Quercus trees |     |          |         |          |         |
|-----------------------|-----|----------|---------|----------|---------|
|                       | Df  | SumOfSqs | R2      | F        | Pr..F.  |
| area                  | 3   | 1.56339  | 0.23692 | 18.77119 | 0.00001 |
| year                  | 2   | 1.92806  | 0.29218 | 34.72448 | 0.00001 |
| prim.dist             | 1   | 0.35093  | 0.05318 | 12.64048 | 0.00001 |
| height                | 1   | 0.08318  | 0.01261 | 2.99633  | 0.02465 |
| leaf.cover            | 1   | 0.0636   | 0.00964 | 2.2908   | 0.06657 |
| Residual              | 94  | 2.60965  | 0.39547 | NA       | NA      |
| Total                 | 102 | 6.59881  | 1       | NA       | NA      |

  

| Bialowieca, Quercus trees |    |          |         |          |         |
|---------------------------|----|----------|---------|----------|---------|
|                           | Df | SumOfSqs | R2      | F        | Pr..F.  |
| year                      | 1  | 0.89442  | 0.2652  | 33.13414 | 0.00001 |
| prim.dist                 | 1  | 0.35093  | 0.10405 | 13.00025 | 0.00001 |
| NorthSouth                | 1  | 0.09952  | 0.02951 | 3.68688  | 0.01337 |
| WestEast                  | 1  | 0.03427  | 0.01016 | 1.2697   | 0.26607 |
| leaf.cover                | 1  | 0.07687  | 0.02279 | 2.84766  | 0.03584 |
| Residual                  | 71 | 1.91657  | 0.56828 | NA       | NA      |
| Total                     | 76 | 3.37259  | 1       | NA       | NA      |

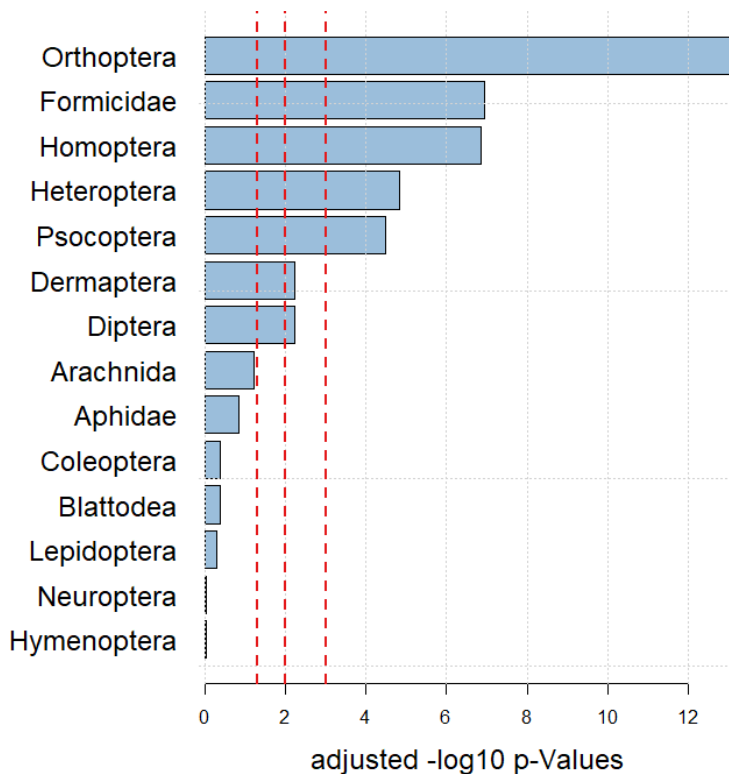

Figure S3. Horizontal bar-plots show multiple testing-adjusted significance levels of the mean abundance of taxa between coniferous and deciduous trees (Wilcox tests). Dotted red lines delineate significance levels on the log x-axis ( $p = 0.05$ ;  $p = 0.01$  and  $p = 0.001$ ). Mean numbers of Arachnida, Aphids, Coleoptera, Blattodea, Lepidoptera (mainly caterpillars), Neuroptera and parasitic Hymenoptera differed not significantly between coniferous and deciduous trees. Number of foggings considered was 902. Only trees fogged more than 5 times were considered, mass events were excluded.
